# Supplementary material
Source: PubMed Central journal article supplement (PMC3159087)

Supplemental Figure 1

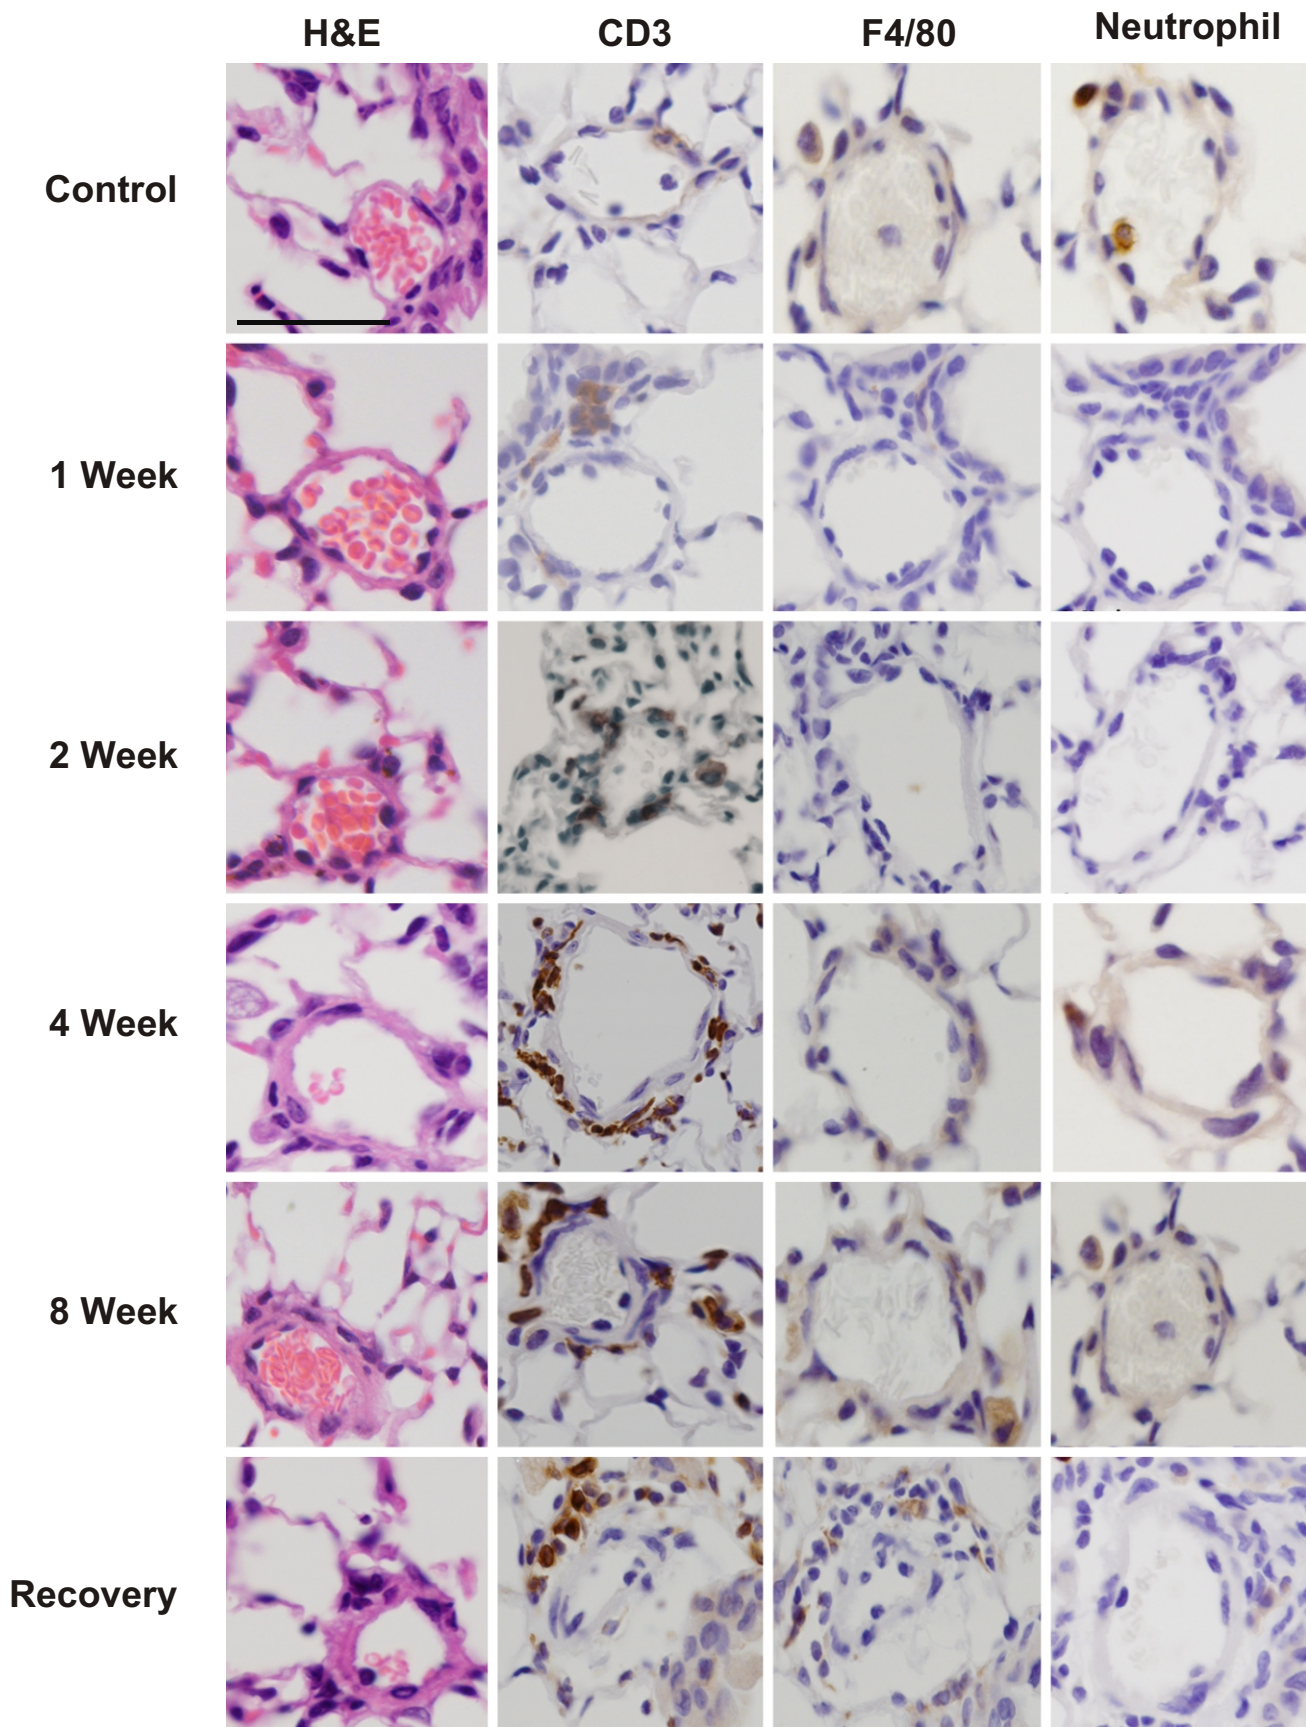

Supplement: supp_45_1_62__2.pdf [file supp_45_1_62__2.pdf]
